# Supplementary material for: The Virome of Bats Inhabiting Brazilian Biomes: Knowledge Gaps and Biases towards Zoonotic Viruses
Source: PubMed Central journal article supplement (PMC9927472; doi:10.1128/spectrum.04077-22), 2023-01-10
Supplement: spectrum.04077-22-s0005.pdf [file spectrum.04077-22-s0005.pdf]

**A**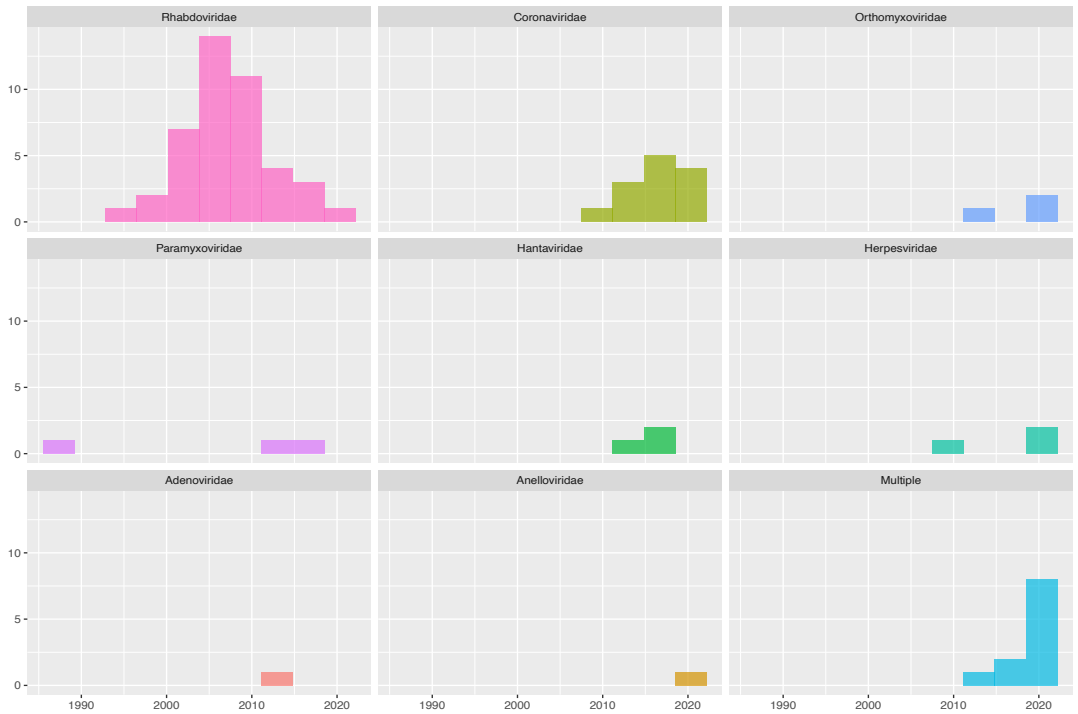**B**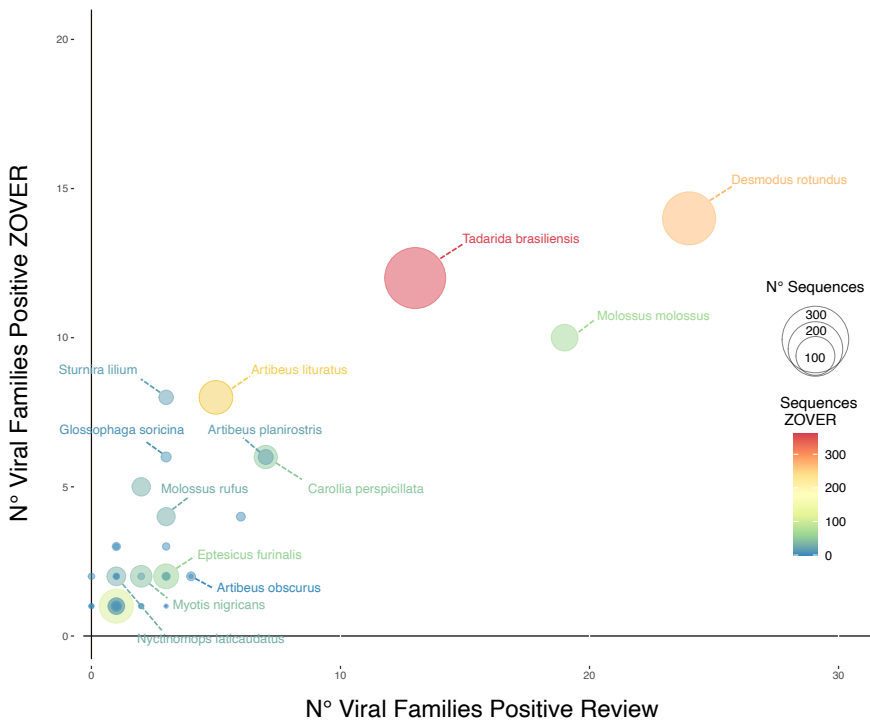

**Figure S1-** Distribution of studies per viral family per year (A). Correlation between the number of viral families positive in the review and ZOVER databases (B).

# Bat species distribution and studied status per Brazilian state

Legend  Occurrence  Studied

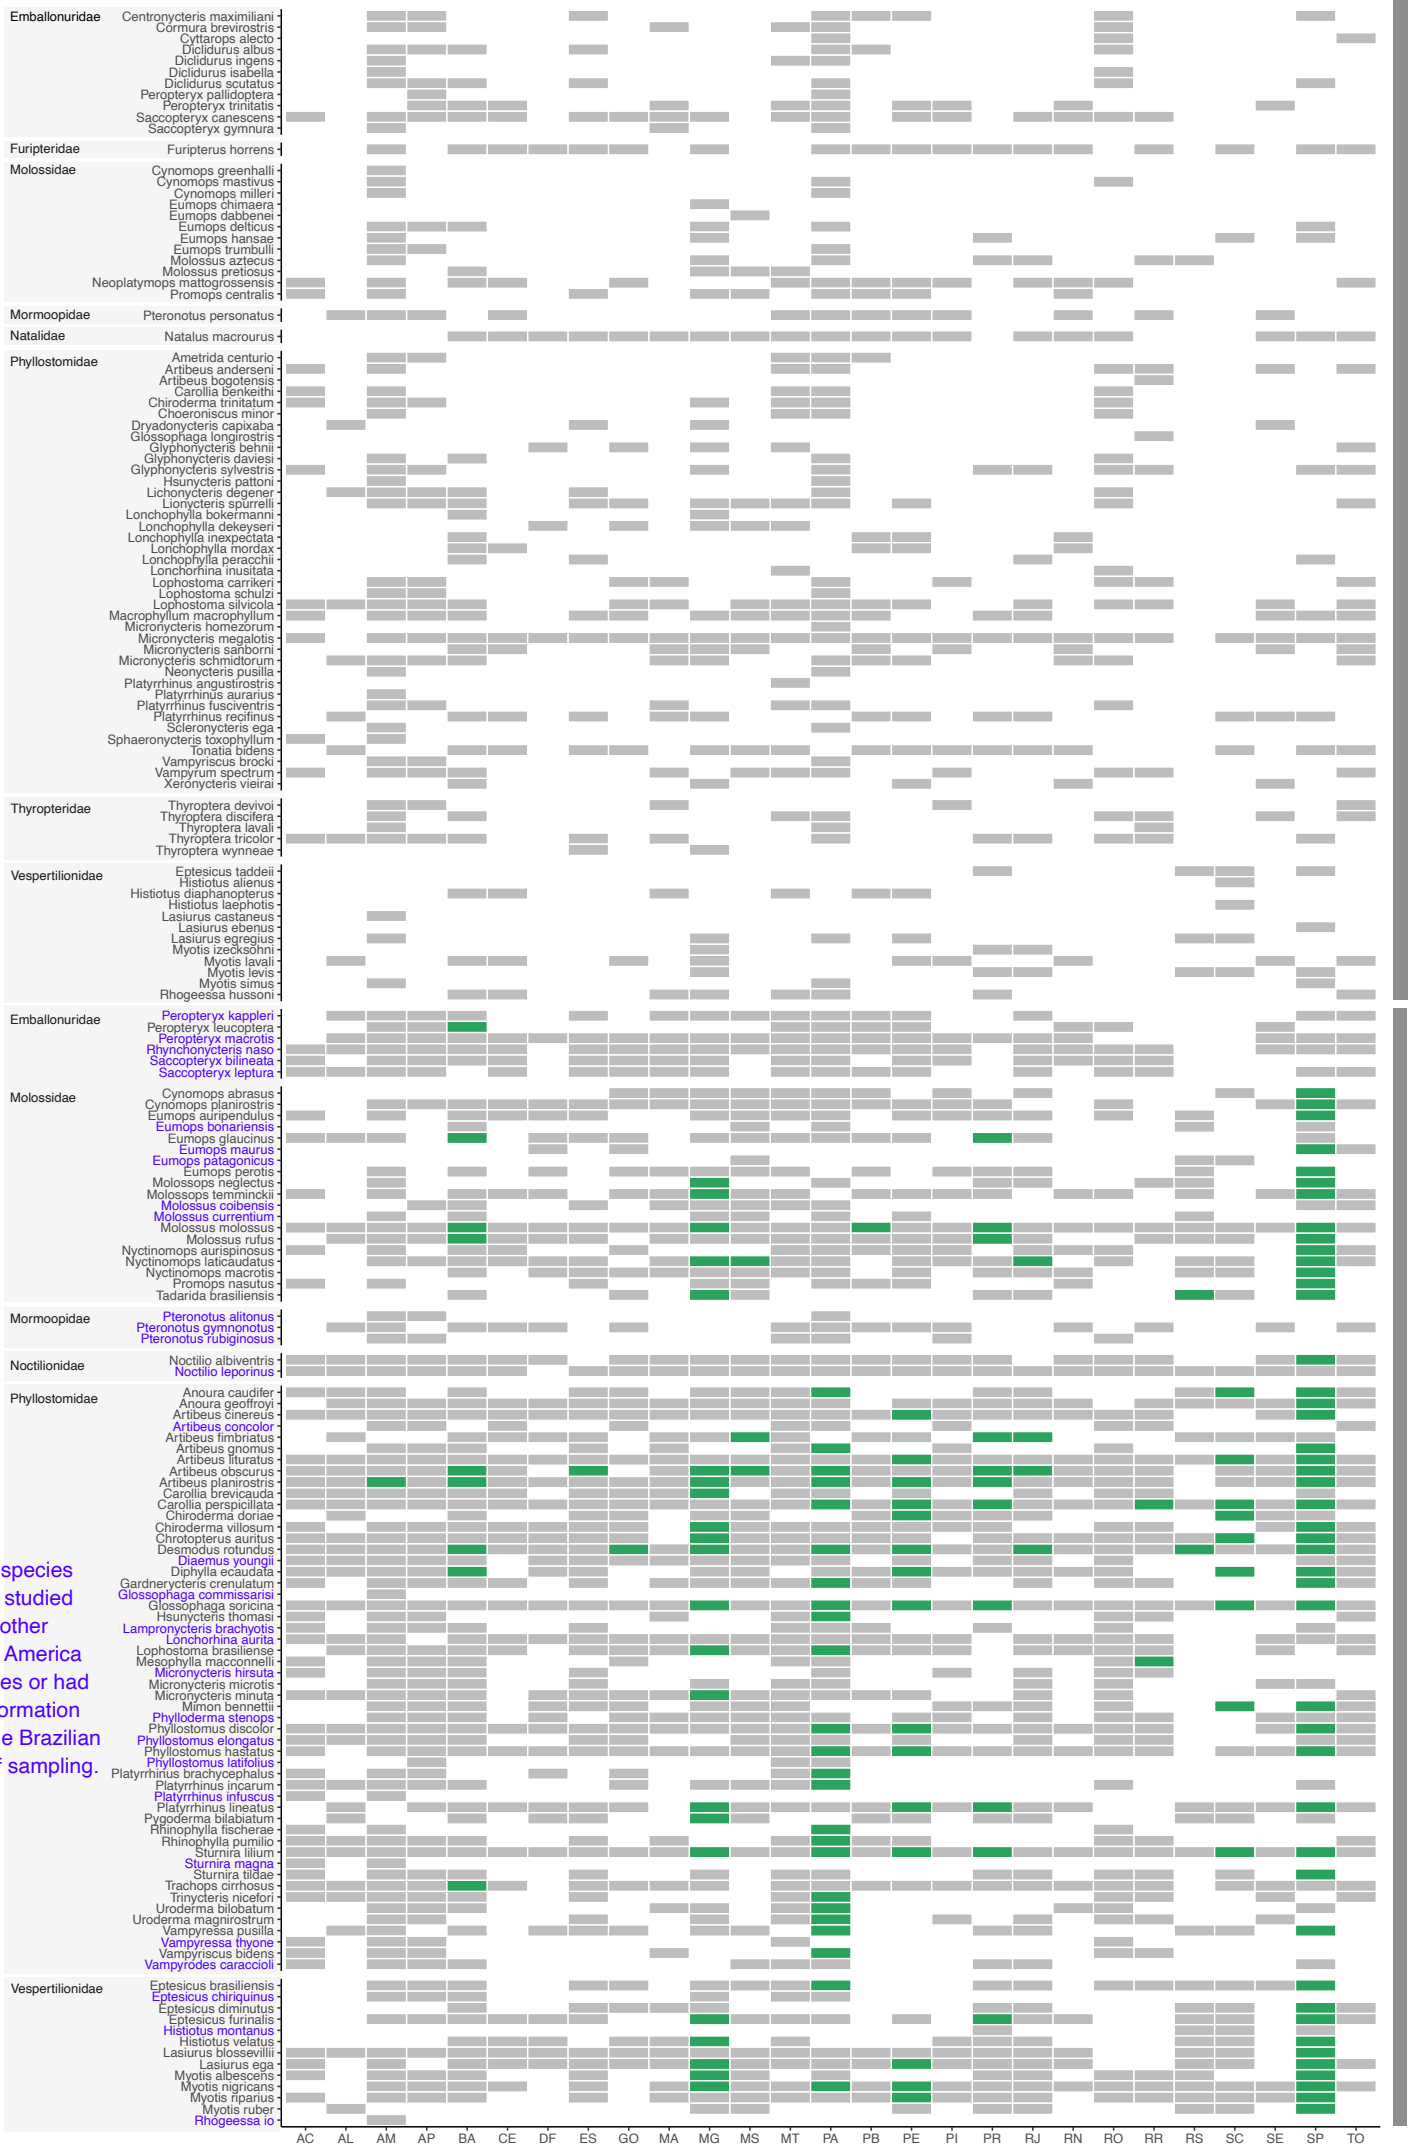

# N° bat species positive per all varial families detected

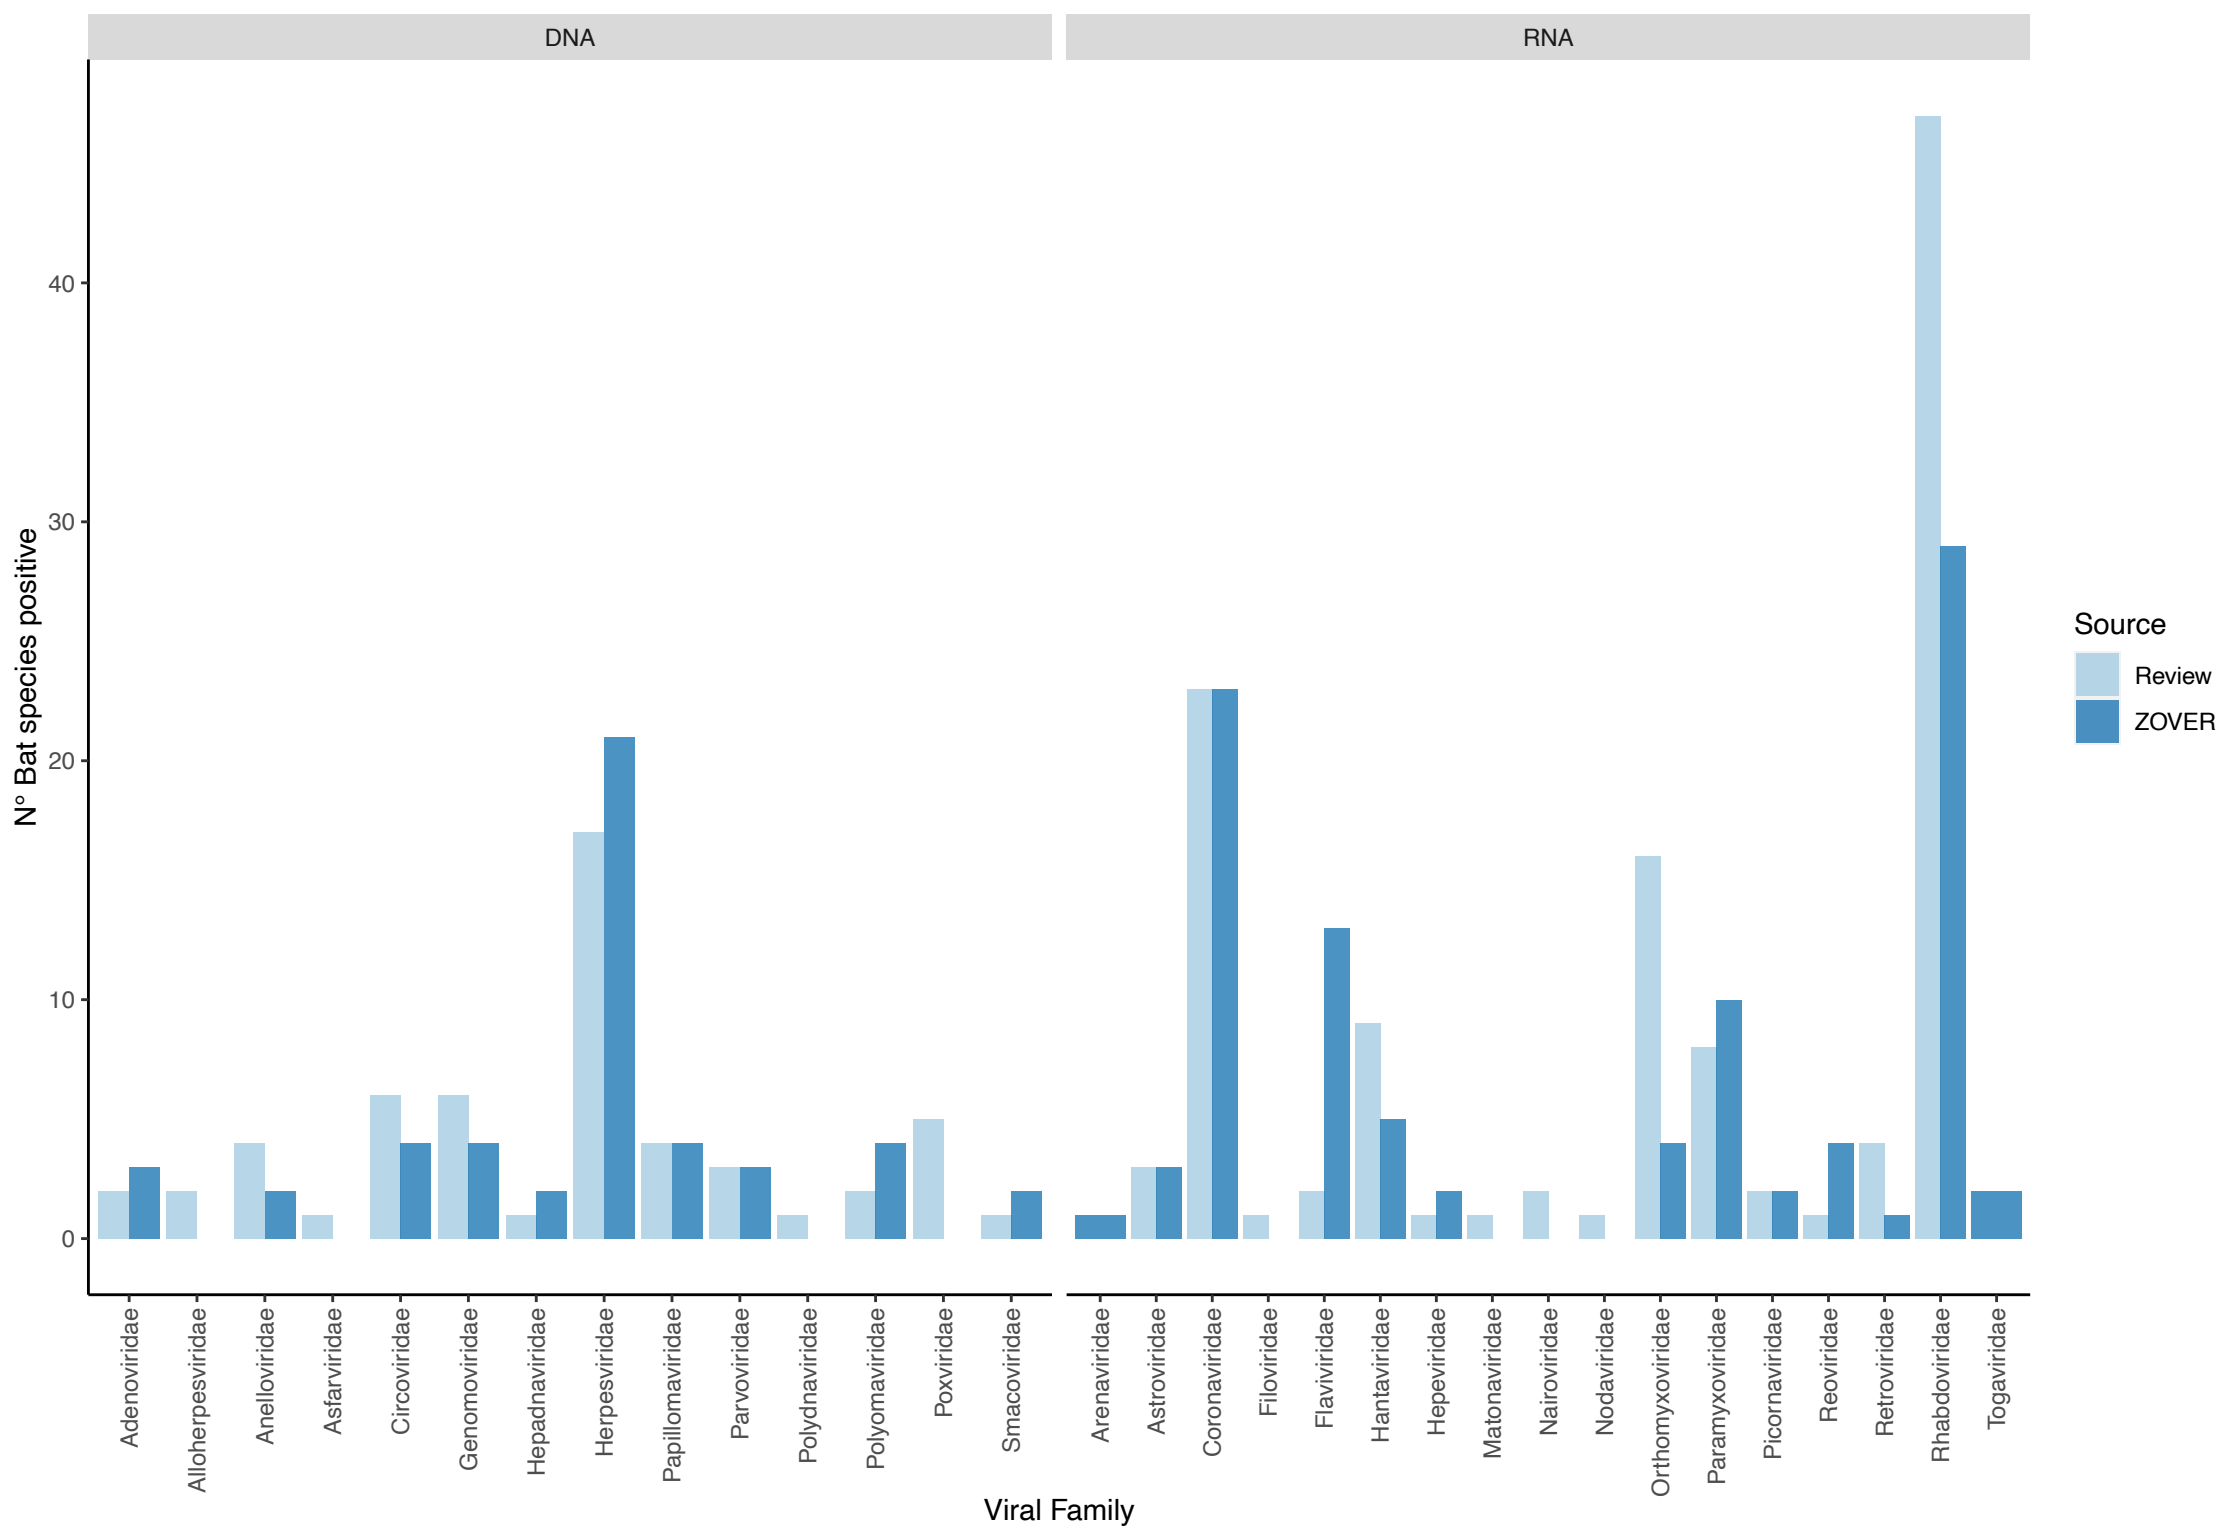

**Figure S3** - Number of bat species positive per viral family in ZOVER and the Review database.

**Figure S1** - Distribution of studies per viral family per year (**A**). Correlation between the number of viral families positive in the review and ZOVER databases (**B**).

**Figure S2** - Bat species distribution and studied status per Brazilian state.

**Figure S3** - Number of bat species positive per viral family in ZOVER and the Review database.

**Supplementary File 1** - List of all manuscripts reviewed in this study including the methodologies employed for viral detection.

**Supplementary File 2** - Detailed information of each manuscript data extracted.

**Supplementary File 3** - Number of studies and number sequences available in ZOVER for each bat species.

**Supplementary File 4** - Additional stratification of manuscripts based on number of methodologies for viral detection employed, methodology throughput, longitudinal sampling and sample type investigated.
